# Supplementary material for: Optimal Plan for Delivery in Women with Obesity: A Large Population-based Retrospective Cohort Study Using the Better Outcomes Registry and Network (BORN) Database
Source: Research Square preprint supplement (doi:10.21203/rs.3.rs-1984052/v1), 2022-09-02
Supplement: Supplementary file 1 [file 3656a9c46526acf4511c1b3f.docx]

**Table S1: Adverse outcome index (AOI) and Weighted Adverse Outcome Score (WAOS) by plan for delivery using a complete case analysis**

|  | **Expectant Delivery (n=14,275)** | | **Induced Delivery (n=8,837)** | | **No labour caesarean section delivery (n=1,809)** | | **Induced Delivery vs Expectant Management** | **NLCS vs Expectant Management** |
| --- | --- | --- | --- | --- | --- | --- | --- | --- |
| **AOI component** | **n** | **%** | **n** | **%** | **n** | **%** | Adjusted RR (95% CI) | Adjusted RR (95% CI) |
| **Maternal component** |  |  |  |  |  |  |  |  |
| Maternal death | 0 | 0.00 | 0 | 0.00 | 0 | 0.00 |  | |
| Uterine rupture | <6 | S | 7 | 0.08 | <6 | S | DNC | |
| Maternal intensive care unit admission | 22 | 0.15 | 19 | 0.22 | 7 | 0.39 | 1.06 (0.57, 1.99) | 1.57 (0.64, 3.85) |
| Unanticipated operative procedure | 97 | 0.68 | 75 | 0.85 | 30 | 1.66 | 1.14 (0.83, 1.55) | 1.86 (1.26, 2.76) |
| Blood transfusion | 139 | 0.97 | 102 | 1.15 | 20 | 1.11 | 1.12 (0.87, 1.44) | 1.10 (0.69, 1.74) |
| 3rd or 4th degree perineal tear | 630 | 4.41 | 325 | 3.68 | 0 | 0.00 | 0.84 (0.73, 0.96) |  |
| **Any maternal component** | 848 | 5.94 | 497 | 5.62 | 51 | 2.82 | 0.92 (0.83, 1.03) | 0.44 (0.34, 0.58) |
| **Fetal or neonatal component** |  |  |  |  |  |  |  |  |
| Intrapartum or in-hospital newborn death with birth weight >= 2,500g, with no congenital anomalies | 12 | 0.08 | 17 | 0.19 | 0 | 0.00 | 2.31 (1.10, 4.88) |  |
| Birth trauma, >=2000g | 123 | 0.86 | 103 | 1.17 | <6 | S | 1.33 (1.02, 1.73) | 0.20 (0.06, 0.62) |
| NICU admission ≥ 2 days or transfer within 24 hours of birth to a facility with a NICU for an infant ≥ 2,500g | 658 | 4.61 | 426 | 4.82 | 59 | 3.26 | 1.03 (0.91, 1.16) | 0.70 (0.53, 0.91) |
| 5-min Apgar score < 7 | 303 | 2.12 | 211 | 2.39 | 30 | 1.66 | 1.09 (0.91, 1.30) | 0.82 (0.56, 1.19) |
| **Any neonatal component** | 920 | 6.44 | 651 | 7.37 | 80 | 4.42 | 1.12 (1.02, 1.24) | 0.69 (0.55, 0.86) |
| **Any AOI component** | 1,705 | 11.94 | 1,109 | 12.55 | 128 | 7.08 | 1.03 (0.96, 1.11) | 0.58 (0.49, 0.69) |
|  |  |  |  |  |  |  |  |  |
| **WAOS** | **Mean** | **SD** | **Mean** | **SD** | **Mean** | **SD** | **β (95%CI)** | **β (95%CI)** |
| **Maternal WAOS** | 0.82 | 5.84 | 0.97 | 6.57 | 1.19 | 8.91 | 0.08 (-0.09, 0.25) | 0.20 (-0.11, 0.52) |
| **Neonatal WAOS** | 3.00 | 16.46 | 3.75 | 22.01 | 1.66 | 8.16 | 0.71 (0.22, 1.20) | -1.28 (-2.19, -0.37) |
| **Overall AOS** | 3.82 | 17.79 | 4.73 | 23.29 | 2.85 | 12.19 | 0.79 (0.26, 1.31) | -1.08 (-2.06, -0.10) |

Data source: BIS-CIHI linked data 2012-2019
Covariates included in adjusted model were maternal age, neighbourhood education quintile, substance use composite (smoke, drug, alcohol), pre-existing maternal health conditions, mental health, maternal hospital level of care, Obstetrician (y/n), gestational age categories (early term= 37+0 to 38+6, term=39+0 to 41+6), obesity class
DNC=Did not converge
Imputed data were used the estimation of adjusted RR or and adjusted Beta Coefficients
Binary outcomes were estimated using generalized estimating equation models with a log-link function, Poisson distribution and robust error variances.
Continuous outcomes were estimated using a generalized linear model with a normal distribution and identity link function and maternal person as the repeated subject.
